# Supplementary material
Source: Springer Nature journal article supplement (https://www.springermedizin.de/resource/supplementary/12889_2012_5465_MOESM2_ESM.pdf/9495284)
Supplement: MOESM2 [file 9495284]

Total participants (n = 130)

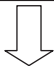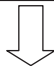

Most important event leading to the realization of tick bite: *direct event* (n = 72)

Most important event leading to the realization of tick bite: *indirect event* (n = 58)

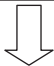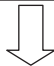

Reason for seeing the GP  
skin rash (n = 56)                      other (n = 16)

Reason for seeing the GP  
skin rash (n = 40)                      other (n = 18)

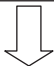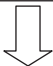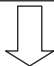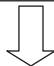

suspecters (n = 38)  
non-suspecters (n = 18)

suspecters (n = 10)  
non-suspecters (n = 6)

suspecters (n = 9)  
non-suspecters (n = 31)

suspecters (n = 7)  
non-suspecters (n = 11)
